# Supplementary material for: HIV-1 Tat and Heparan Sulfate Proteoglycans Orchestrate the Setup of in Cis and in Trans Cell-Surface Interactions Functional to Lymphocyte Trans-Endothelial Migration
Source: MDPI journal article supplement (doi:10.3390/molecules26247488), 2021-12-10
Supplement: s1 [file s1]

# HIV-1 Tat and Heparan Sulfate Proteoglycans Orchestrate the Setup of *in Cis* and *in Trans* Cell-Surface Interactions Functional to Lymphocyte Trans-Endothelial Migration

Chiara Urbinati <sup>1</sup>, Maria Milanesi <sup>1</sup>, Nicola Lauro <sup>1</sup>, Cinzia Bertelli <sup>2</sup>, Guido David <sup>3</sup>, Pasqualina D'Ursi <sup>4</sup>, Marco Rusnati <sup>1,\*</sup> and Paola Chiodelli <sup>1,\*</sup>

<sup>1</sup> Experimental Oncology and Immunology, Department of Molecular and Translational Medicine, University of Brescia, 25123 Brescia, Italy; chiara.urbinati@unibs.it (C.U.); m.milanesi006@unibs.it (M.M.); nik\_lauro@hotmail.it (N.L.)

<sup>2</sup> Department of Cellular, Computational and Integrative Biology, University of Trento, 38123, Povo, Trento, Italy; cinzia.bertelli@unitn.it

<sup>3</sup> Department of Human Genetics, University of Leuven, B-3000 Leuven, Belgium; guido.david@kuleuven.be

<sup>4</sup> Institute for Biomedical Technologies, National Research Council (ITB-CNR), 20090, Segrate (MI), Italy; pasqualina.dursi@itb.cnr.it

\* Correspondence: marco.rusnati@unibs.it (M.R.); paola.chiodelli@unibs.it (P.C.)

**Table S1.** Quantification of the Tat-dependent activation of the various receptors and second messengers in Table 1. c and 2d) or Tat versus naïve (Figure 4a). p-value: \* <0.05, \*\* < 0.01. n.d., not determined.

| Receptors/Second Messengers | Figure 1c   | Figure 2d | Figure 4a   |
|-----------------------------|-------------|-----------|-------------|
| P-ERK <sub>1/2</sub>        | 174 ± 14 ** | 108 ± 8   | 347 ± 36 ** |
| P-src                       | 150 ± 28    | 109 ± 9   | 132 ± 10 *  |
| P-FAK                       | 192 ± 32 *  | 87 ± 10   | 165 ± 36    |
| P-VEGFR2                    | n.d.        | n.d.      | 240 ± 43 *  |

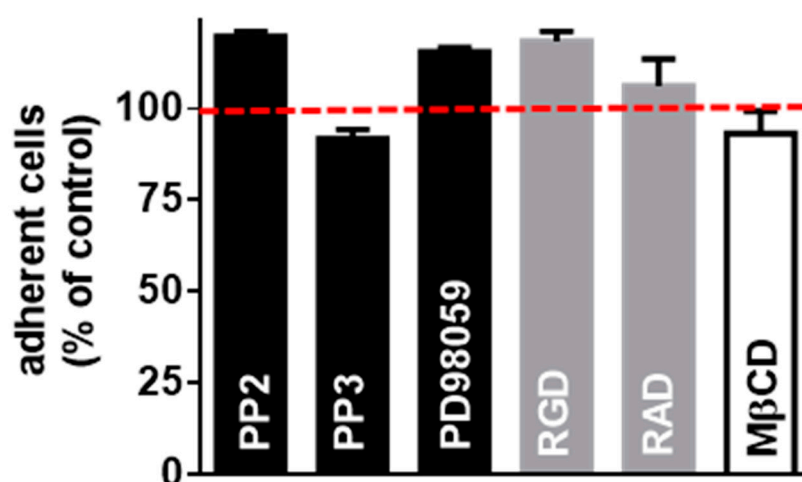

**Figure S1.** Inhibitors of integrin, src, ERK<sub>1/2</sub> and lipid raft formation do not affect SYN-NCs adhesion to Tat. SYN-NCs were seeded onto plastic-immobilized Tat in the absence or in presence of the indicated compounds (same doses used for cell spreading assays). After 2 hours, adherent cells were counted and expressed as mean percentage ± S.E.M. in respect to the number of cells that adhered to Tat in the absence of any inhibitor (red dotted line).

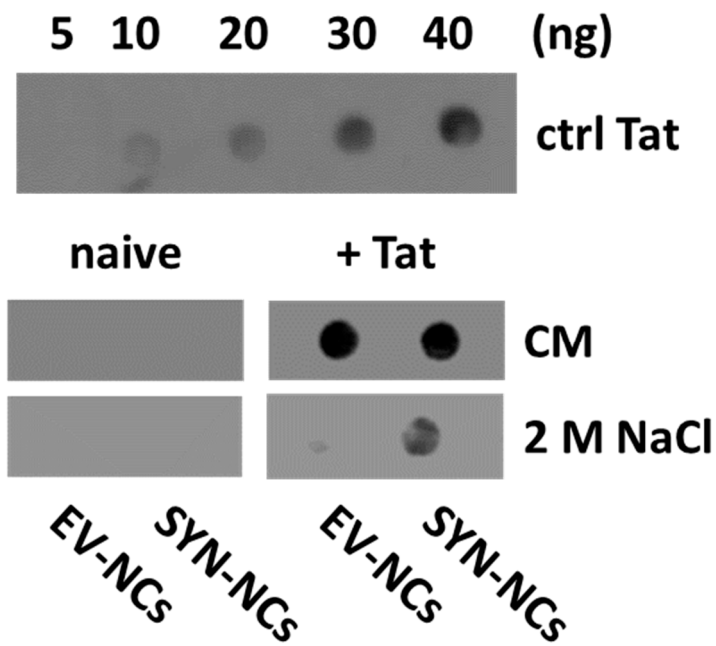

**Figure S2.** Coating of the lymphocyte surface with Tat. Samples ( $1 \times 10^6$  cells) of EV-NCs or SYN-NCs were incubated for 30 min at 37° C in the absence or in the presence of Tat (550 nM). At the end of incubation, conditioned medium was removed and cells extensively with PBS to remove un-bound Tat. Then, cells were washed twice with 1.5 M NaCl., a treatment that is known to detach Tat from HSPGs binding [1]. The entire volume of the PBS washing, the 1,5 M NaCl washing and conditioned media (CM) from the different experimental conditions were subjected to dot blot analysis with anti-Tat antibodies.

## References

1. Urbinati, C.; Bugatti, A.; Oreste, P.; Zoppetti, G.; Waltenberger, J.; Mitola, S.; Ribatti, D.; Presta, M.; Rusnati, M. Chemically sulfated Escherichia coli K5 polysaccharide derivatives as extracellular HIV-1 Tat protein antagonists. FEBS letters 2004, 568, 171-177, doi:10.1016/j.febslet.2004.05.033.
